# Supplementary material
Source: publisher figshare collection journal article supplement (https://tandf.figshare.com/ndownloader/files/38311602)
Supplement: Supplementary file 1 [file 38311602]

**Appendix 2**

3 sample Multiple Choice Questions used to assess the cognitive aspect of learning the Confrontational Visual Field Examination. Right answers are highlighted in yellow.

1. The distance between the examiner and the patient when testing for paracentral field using the red hat pin should be:
   1. There is no specific distance required as long as the patient and examiner maintain equal eye level.
   2. Two-arms distance
   3. One-arm distance
   4. Half-arm distance
   5. One meter
2. When FIRST assessing peripheral vision:
   1. Move finger diagonally in from periphery to the centre til it is reported to appear, but keep the finger still to ensure maximum accuracy
   2. Move white hat pin diagonally in from periphery to the centre til it is reported to appear, but keep the white hat pin still to ensure maximum accuracy
   3. Move red hat pin diagonally in from periphery to the centre til it is reported to appear, but keep the red hat pin still to ensure maximum accuracy
   4. Move finger diagonally in from periphery to the centre til it is reported to appear, but keep the finger wiggling to ensure maximum accuracy
   5. Move white hat pin diagonally in from periphery to the centre til it is reported to appear, but keep the white hat pin wiggling to ensure maximum accuracy
3. At the start of the examination, after asking the patient to cover one eye and fixate, which of the following is asked by the examiner to screen for gross visual abnormalities?
   1. Can you see my whole face?
   2. Can you see my nose clearly?
   3. How many fingers is this?
   4. Can you see my eye?
   5. What are you wearing the glasses for?
